# Supplementary material for: Cost Effectiveness of Quadrivalent Versus Trivalent Inactivated Influenza Vaccines for the Portuguese Elderly Population
Source: MDPI journal article supplement (doi:10.3390/vaccines10081285), 2022-08-09
Supplement: s1 [file s1]

**Table S2.** Input parameters. Base case value; SD; parameters of the probability distribution.

| <b>Input Parameters</b>                                               | <b>Base Case</b> | <b>SD</b> | <b>Distribution</b> | <b>Parameter 1</b> | <b>Parameter 2</b> |
|-----------------------------------------------------------------------|------------------|-----------|---------------------|--------------------|--------------------|
| Probability of Confirmed Influenza                                    | 0.278            | 0.037     | Beta                | 39.72              | 103.28             |
| Probability of being ≥65years when ILI                                | 0.130            | 0.0095    | Beta                | 162.87             | 1089.13            |
| Disutility associated with ILI without influenza confirmation         | 0.009            | 0.0010    | Gamma               | 77.79              | 0.00012            |
| Disutility associated with no hospitalized influenza                  | 0.009            | 0.0010    | Gamma               | 77.79              | 0.00012            |
| Disutility associated with hospitalization due to influenza           | 0.031            | 0.0031    | Gamma               | 102.55             | 0.00030            |
| Disutility associated with hospitalization due to pneumonia           | 0.031            | 0.0031    | Gamma               | 102.55             | 0.00030            |
| Disutility associated with hospitalization due to respiratory disease | 0.031            | 0.0031    | Gamma               | 102.55             | 0.00030            |
| Disutility associated with hospitalization due to heart disease       | 0.031            | 0.0031    | Gamma               | 102.55             | 0.00030            |
| Utility associated with healthy population                            | 0.625            | 0.0163    | Gamma               | 525.41             | 0.00071            |
| Vaccination coverage rate                                             | 0.501            | 0.041     | Beta                | 74.68              | 74.38              |
| Proportion of B lineage viruses not included in TIV                   | 0.087            | 0.002     | Beta                | 15.77              | 165.81             |
| Relative Risk<br>(1-Trivalent Vaccine Effectiveness)                  | 0.421            | 0.228     | Lognormal           | -0.865             | 0.228              |

SD: Standard Deviation
