# Supplementary material for: Cost Effectiveness of Quadrivalent Versus Trivalent Inactivated Influenza Vaccines for the Portuguese Elderly Population
Source: MDPI journal article supplement (doi:10.3390/vaccines10081285), 2022-08-09
Supplement: s1 [file s1]

**Table S1.** Description of the variables that take part of Figure S1.

| Code           | Description                                               | Code            | Description                                                           |
|----------------|-----------------------------------------------------------|-----------------|-----------------------------------------------------------------------|
| p_ili          | Probability of Influenza-like-illness                     | c_death_hosp_RD | Cost of death when Hospitalization due to RD                          |
| p_conf_ili     | Probability of Confirmed Influenza                        | c_hosp_HD       | Cost of Hospitalization due to Heart Disease                          |
| p_gp           | Probability of GP Consultation                            | c_death_hosp_HD | Cost of death when Hospitalization due to HD                          |
| p_hosp_inf     | Probability of hospitalization due to Influenza           | c_death         | Cost of death                                                         |
| p_death_inf    | Probability of death when Hosp. Influenza                 | c_ant_treat     | Cost of antiviral treatment                                           |
| p_hosp_pneu    | Probability of hospitalization due to Pneumonia           | c_tiv           | Cost of trivalent vaccine                                             |
| p_death_pneu   | Probability of death due to Hosp. Pneumonia               | c_qiv           | Cost of quadrivalent vaccine                                          |
| p_hosp_RD      | Probability of hospitalization due to Respiratory Disease | c_vac_admin     | Cost of vaccine administration                                        |
| p_death_RD     | Probability of death when Hosp. RD                        |                 | Disutility associated with ILI without influenza confirmation         |
| p_hosp_HD      | Probability of hospitalization due to Heart Disease       | u_ili_no_inf    |                                                                       |
| p_death_HD     | Probability of death when Hosp. HD                        | u_inf_no_hosp   | Disutility associated with no hospitalized influenza                  |
| p_death_no_inf | Probability of death when no confirmed influenza          | u_hosp_inf      | Disutility associated with hospitalization due to influenza           |
|                |                                                           |                 | Disutility associated with hospitalization due to pneumonia           |
| c_ili_no_inf   | Cost of ILI without influenza confirmation                | u_hosp_pneu     | Disutility associated with hospitalization due to respiratory disease |
| c_GP           | Cost of GP consultation                                   | u_hosp_RD       | Disutility associated with hospitalization due to heart disease       |
| c_hosp_inf     | Cost of Hospitalization due to Influenza                  | u_hosp_HD       |                                                                       |
|                |                                                           | u_healthy       | Utility associated with healthy population                            |

|                   |                                                     |            |                                    |
|-------------------|-----------------------------------------------------|------------|------------------------------------|
| c_death_inf       | Cost of death when Hosp. Influenza                  | Pop        | Population                         |
| c_hosp_pneu       | Cost of Hospitalization due to Pneumonia            | Coverage   | Vaccination Coverage Rate          |
| c_death_hosp_pneu | Cost of death when Hospitalization due to Pneumonia | tiv_effect | Trivalent Vaccine Effectiveness    |
| c_hosp_RD         | Cost of Hospitalization due to Respiratory Disease  | qiv_effect | Quadrivalent Vaccine Effectiveness |
