# Supplementary material for: Cost Effectiveness of Quadrivalent Versus Trivalent Inactivated Influenza Vaccines for the Portuguese Elderly Population
Source: MDPI journal article supplement (doi:10.3390/vaccines10081285), 2022-08-09
Supplement: s1 [file s1]

**Table S3.** Probabilistic sensitivity analysis. Assessing the 2015/16 influenza season-related uncertainty.

| Parameter                               | TIV          | QIV          | Difference<br>(QIV-TIV) |
|-----------------------------------------|--------------|--------------|-------------------------|
| <b>Events</b>                           |              |              |                         |
| GP Consultations                        | 2,636.73     | 2,602.02     | -34.71                  |
| Hospitalizations due to Influenza       | 239.00       | 235.85       | -3.15                   |
| Deaths due to Influenza Hospitalization | 19.00        | 18.75        | -0.25                   |
| Hospitalizations due to Pneumonia       | 21.00        | 20.72        | -0.28                   |
| Deaths due to Pneumonia Hospitalization | 8.00         | 7.89         | -0.11                   |
| Hospitalizations due to RD              | 40.00        | 39.47        | -0.53                   |
| Deaths due to RD Hospitalization        | 2.00         | 1.97         | -0.03                   |
| Hospitalizations due to HD              | 73.00        | 72.04        | -0.96                   |
| Deaths due to HD Hospitalization        | 8.00         | 7.89         | -0.11                   |
| Vaccine Doses                           | 1,037,847    | 1,037,847    | 0.00                    |
| <b>Costs</b>                            |              |              |                         |
| GP Consultations                        | 81,739 €     | 80,663 €     | -1,076 €                |
| Hospitalizations due to Influenza       | 710,476 €    | 701,447 €    | -9,029 €                |
| Deaths due to Influenza Hospitalization | 121,553 €    | 119,977 €    | -1,576 €                |
| Hospitalizations due to Pneumonia       | 128,214 €    | 126,553 €    | -1,661 €                |
| Deaths due to Pneumonia Hospitalization | 90,401 €     | 89,220 €     | -1,181 €                |
| Hospitalizations due to RD              | 99,127 €     | 97,877 €     | -1,250 €                |
| Deaths due to RD Hospitalization        | 2,731 €      | 2,698 €      | -33 €                   |
| Hospitalizations due to HD              | 256,052 €    | 252,779 €    | -3,273 €                |
| Deaths due to HD Hospitalization        | 62,303 €     | 61,493 €     | -810 €                  |
| Vaccine Doses                           | 2,673,494 €  | 7,983,576 €  | 5,310,082 €             |
| Total                                   | 8,029,692 €  | 13,323,148 € | 5,293,456 €             |
| CI lower bound                          | 6,904,148 €  | 11,292,400 € | 4,375,217 €             |
| CI upper bound                          | 9,018,064 €  | 15,125,063 € | 6,088,637 €             |
| <b>QALYs</b>                            |              |              |                         |
| Total                                   | 1,265,457.89 | 1,265,458.09 | 0.20                    |
| CI lower bound                          | 1,197,368.63 | 1,197,368.75 | 0.06                    |
| CI upper bound                          | 1,328,396.10 | 1,328,396.36 | 0.43                    |
| <b>ICER (€/QALY)</b>                    |              |              | 34,501,793              |
| CI lower bound                          |              |              | 13,052,665              |
| CI upper bound                          |              |              | 87,418,632              |
