# Supplementary figures and images for: Cost Effectiveness of Quadrivalent Versus Trivalent Inactivated Influenza Vaccines for the Portuguese Elderly Population
Source: MDPI journal article supplement (doi:10.3390/vaccines10081285), 2022-08-09

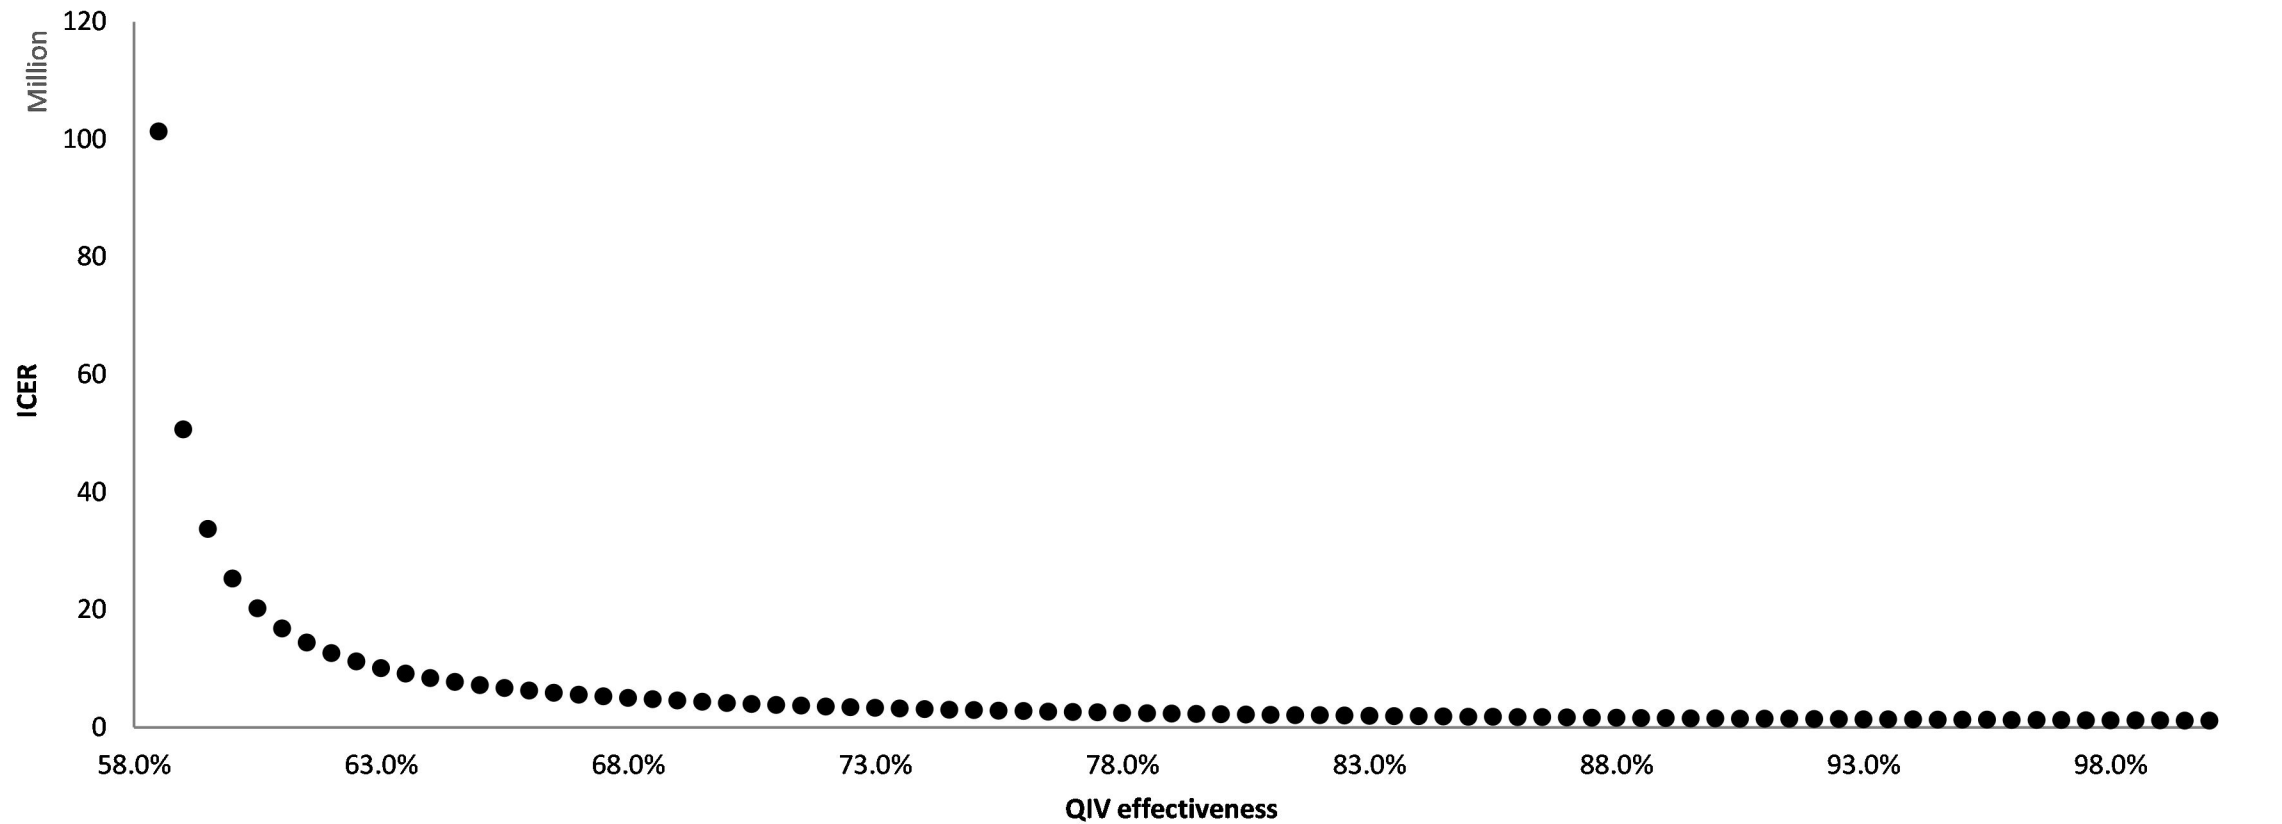

Supplement: s1 [file s1]

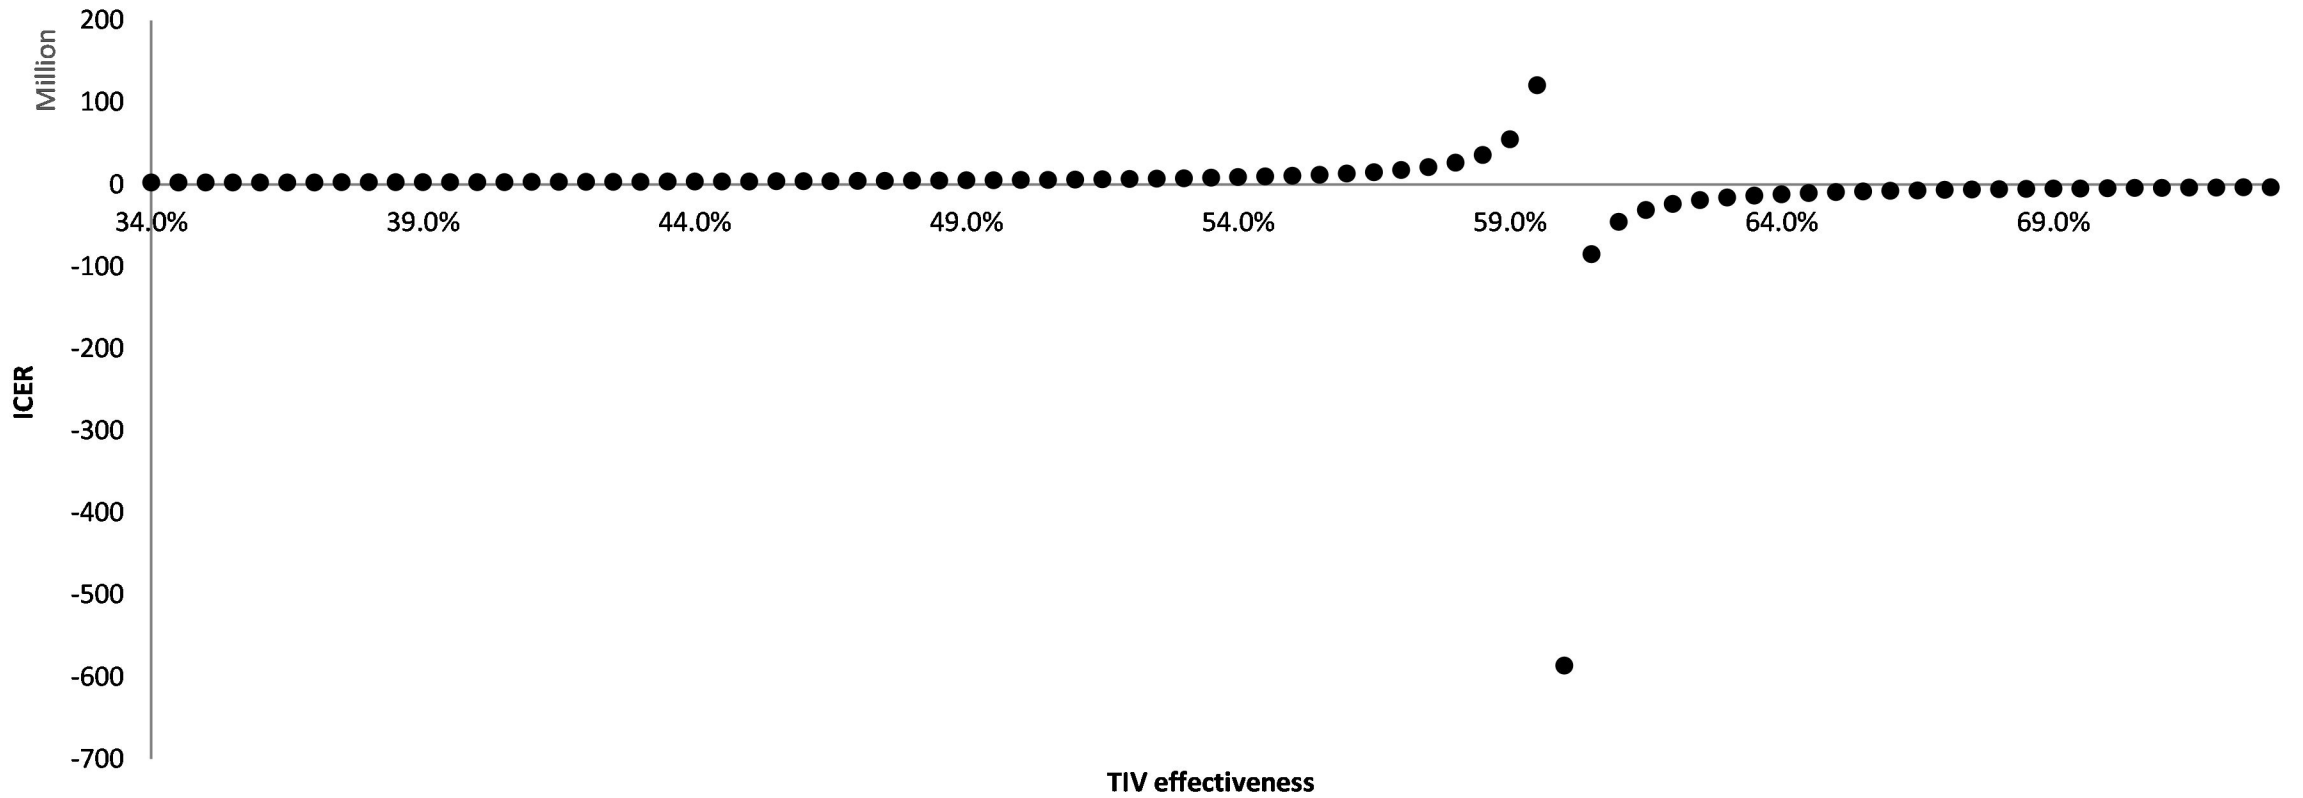

Supplement: s1 [file s1]

# The Cost-effectiveness Plane

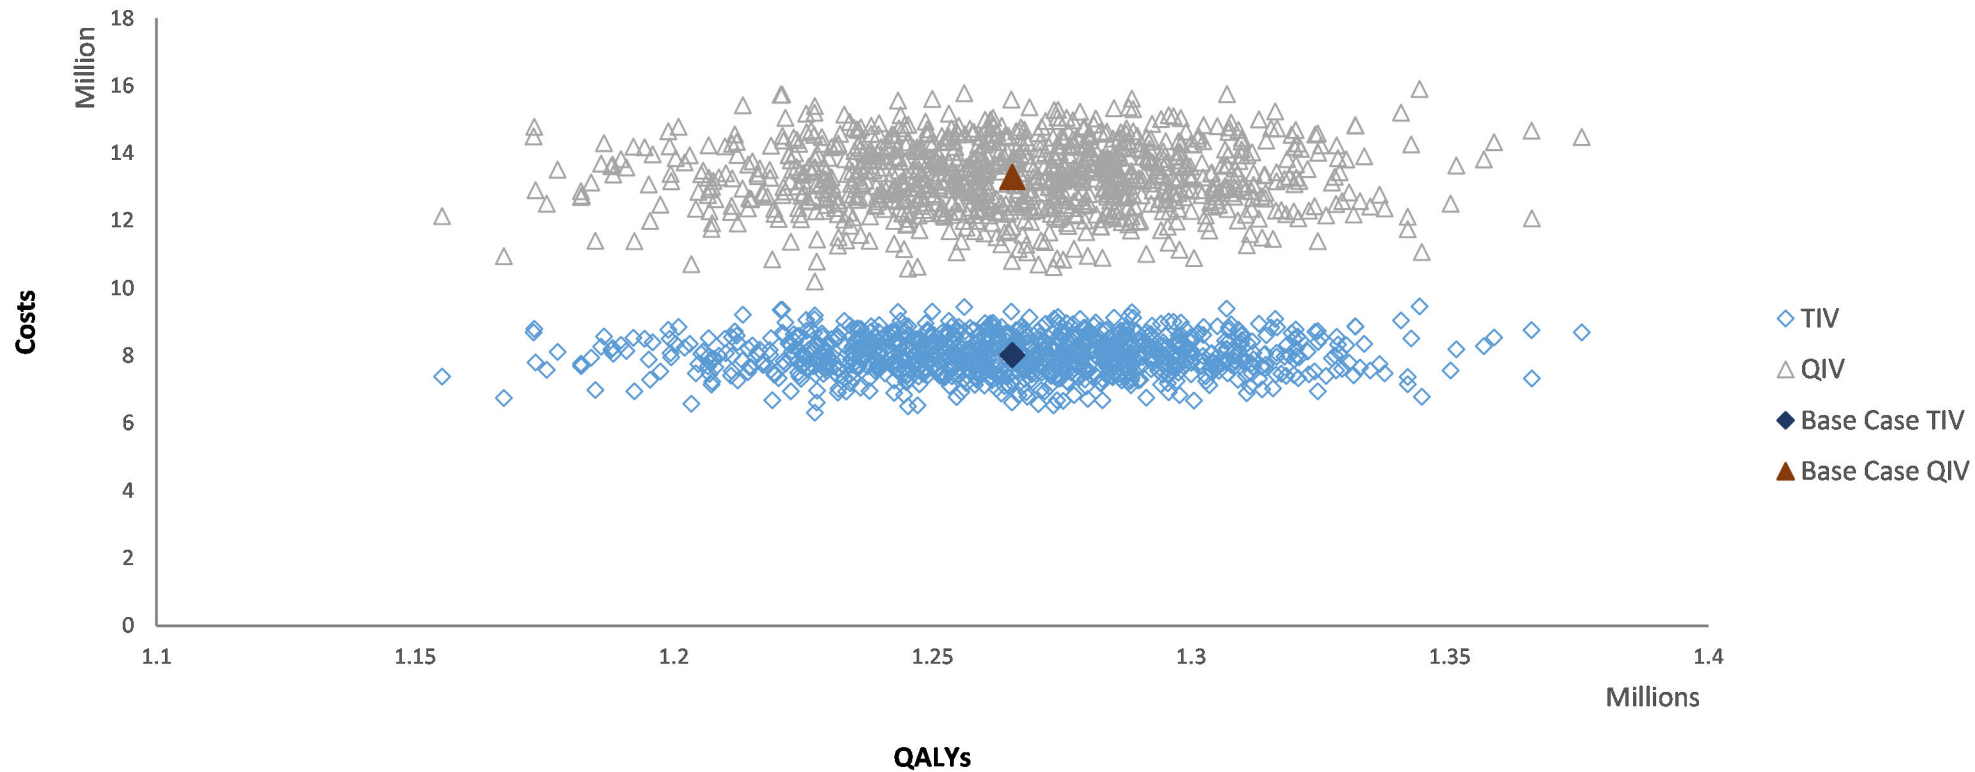

Supplement: s1 [file s1]

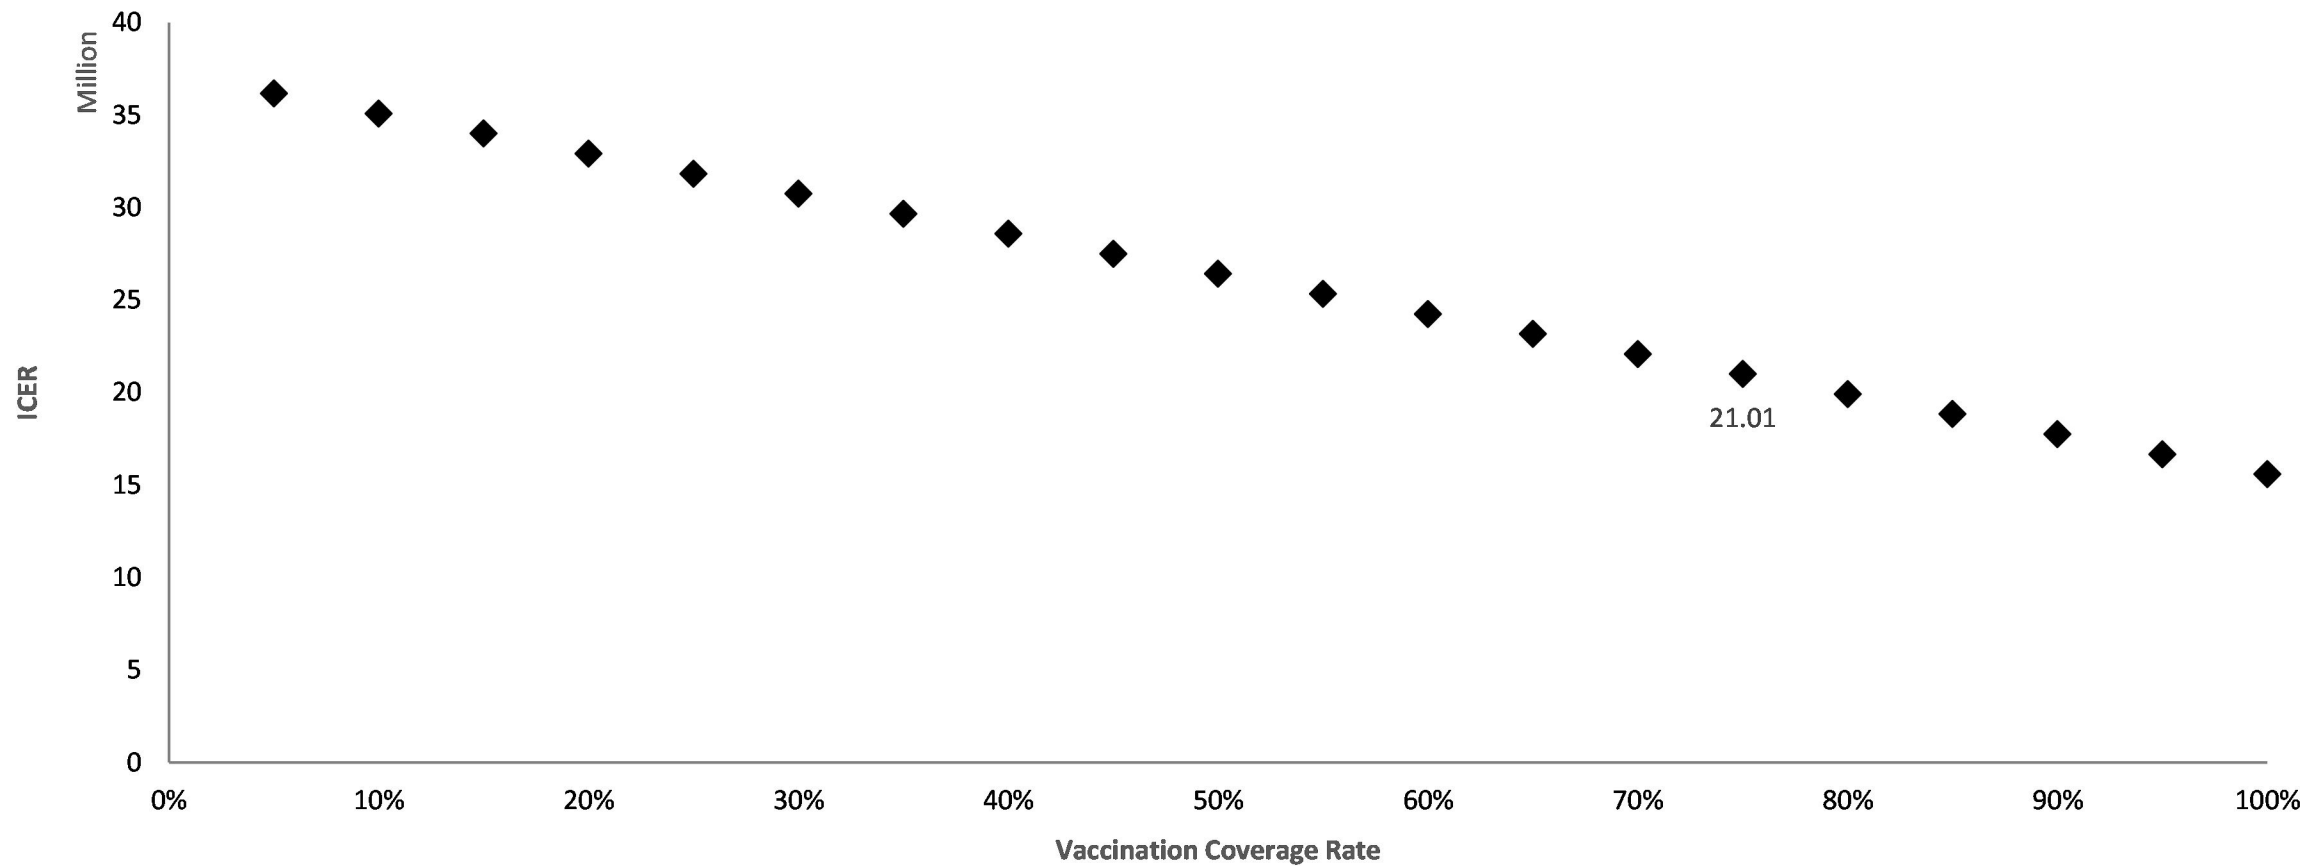

Supplement: s1 [file s1]

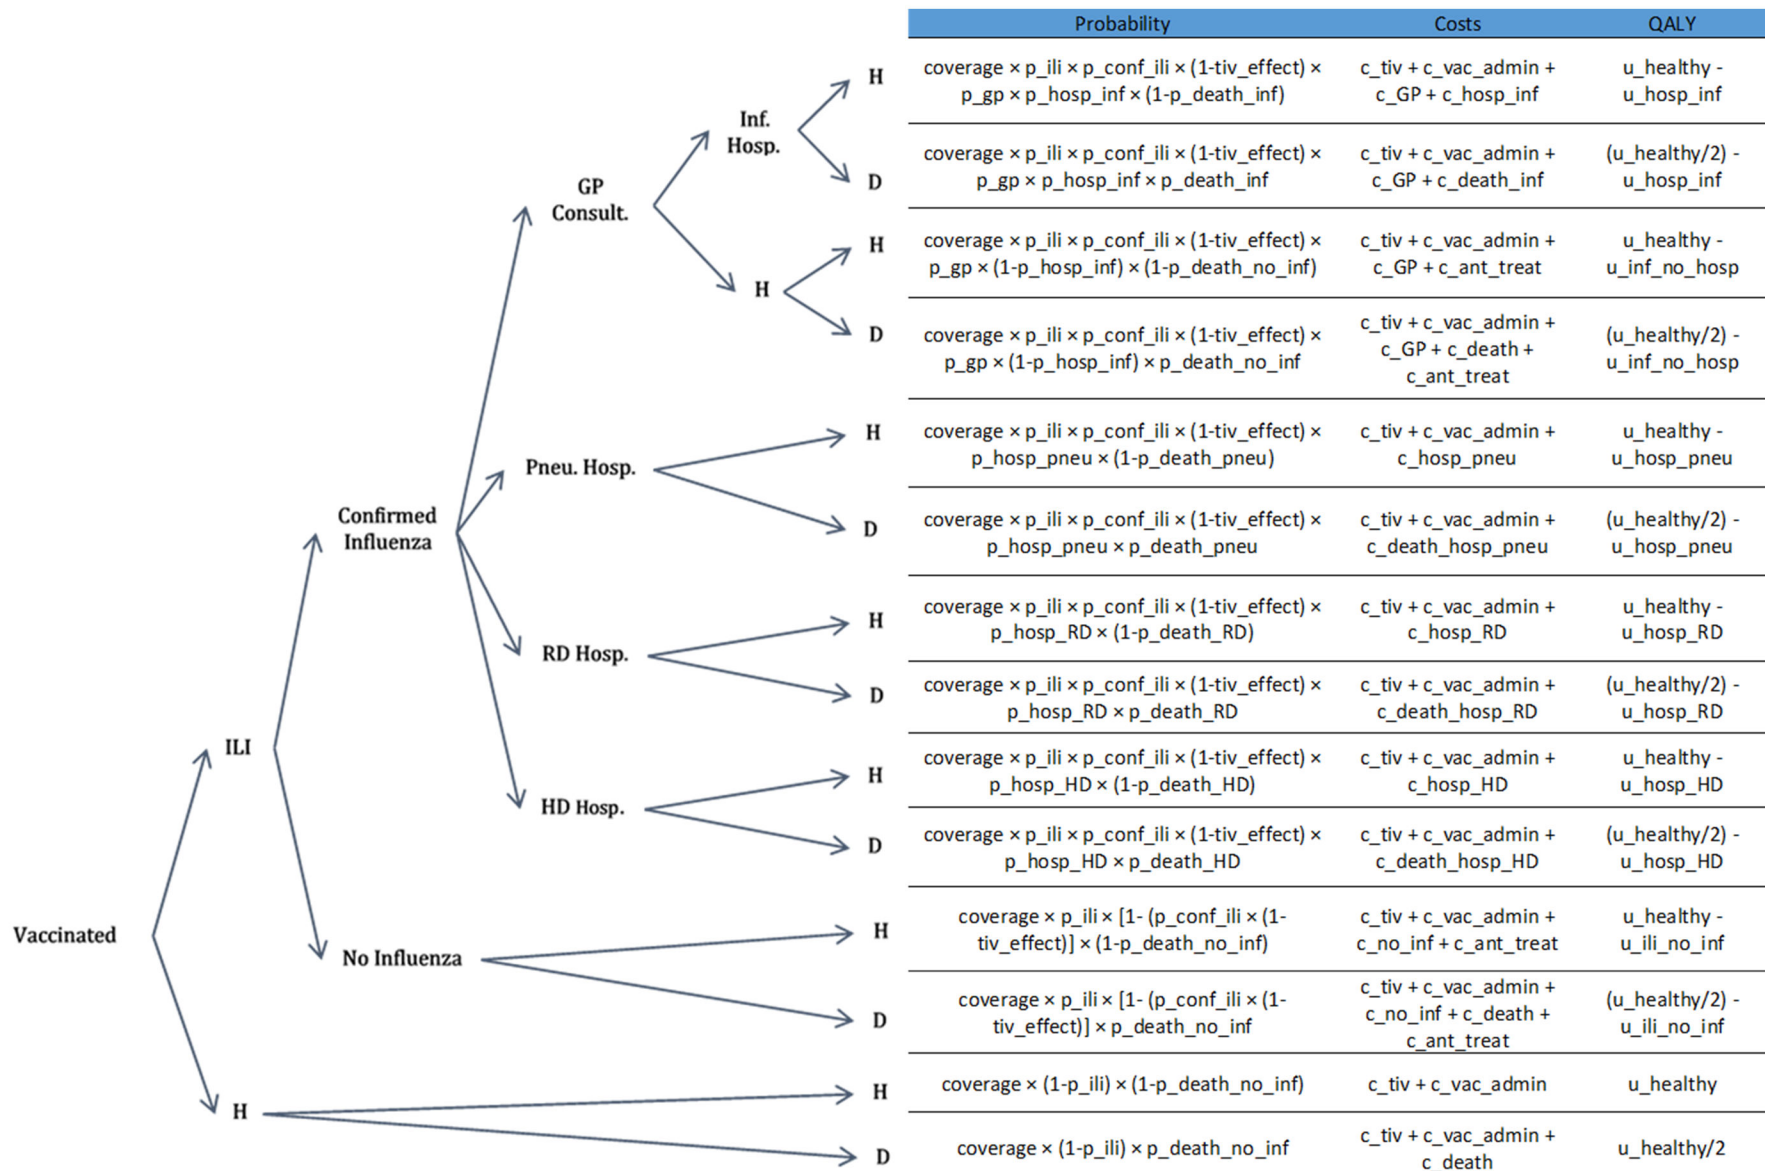

Supplement: s1 [file s1]
